# Supplementary material for: Modeling to capture bystander-killing effect by released payload in target positive tumor cells
Source: Springer Nature journal article supplement (doi:10.1186/s12885-019-5336-7), 2019-03-04
Supplement: MOESM1 [file 16524484]

# Appendix

## Survival function

A stochastic model may be defined based on its retention-time distributions. It relies on a continuous-time probability distribution rather than on a conditional transfer probability in discretized units of size  $\Delta t$ . Let  $A$  be Ag- cells of a particle in a compartment. Define a cumulative distribution function  $F(a)$ , i.e.,  $F(a) = Pr(A < a)$ . Then, create a density function  $\phi$  defined by  $\phi(a) = dF(a)/da$ . Note that  $F(a) = Pr(A < a)$  is actually the distribution function of  $A$ , which indicates the probability that a molecule will leave the compartment prior to attaining Ag- cells  $a$ . We can denote the survival function  $\Phi$  as  $\Phi(a) = P(A \geq a) = 1 - F(a)$  to represent the probability that the molecule survives in the compartment to reach the Ag- cells by  $a$ . Define a hazard function  $h(a)$  as

$$h(a) = \frac{\phi(a)}{\Phi(a)}.$$

This yields a simple relationship

$$\frac{d \log \Phi(a)}{da} = -h(a),$$

which explains the relation between the hazard rate and the survival function.

## Development of an age-structure model

Let  $\rho(t, a)$  be a flux density of an ensemble of particles that have reached age  $a$  in the compartment at time  $t$ . It is assumed that the density of the particles created in the compartment by the creation process between  $t$  and  $t + \Delta t$  is  $\beta(t)\Delta t + o(\Delta t)$ . Note that based on continuous time random walk, the creation process is a removal process from a previous compartment. We consider that the probability of a particle being removed from the ensemble at time  $t$  only depends on the state of the system at time  $t$ . A particle will be removed through the Markovian removal process from  $t$  to  $t + \Delta t$ , which is  $\lambda(t)\Delta t + o(\Delta t)$ . Then, a survival function is as follows:

$$\Theta(t, t_0) = e^{-\int_{t_0}^t \lambda(s) ds}. \quad (1)$$

We also consider a non-Markovian removal process, in which the probability that a particle is removed from the ensemble depends on the length of time after the particle has entered the compartment. If the particles enter the compartment at  $t_0$  and survive until age  $a = t - t_0$ , then the survival function for a non-Markovian removal process is given by

$$\Phi(a) = 1 - \int_{t_0}^t \phi(u) du, \quad (2)$$

where  $\phi$  is the probability density function such that  $\int_{t_0}^t \phi(u) du$  is the probability that the particle leaves the compartment before time  $t$ . If we consider

$q(t)$  as the flux into the compartment at  $t$ -based on CTRW, then  $q(t) = q_0\delta(t - 0+) + q^+(t)$ , where  $\delta$  is derac-delta,  $q_0$  is a constant, and  $q^+$  is right continuous at  $t = 0$ , and continuous at  $t > 0$ . If the Markovian removal process and non-Markovian removal process are independent, we may define  $\rho(t, a)$  as

$$\rho(t, a) = \Phi(a)\Theta(t, t - a)q(t - a),$$

with  $\rho(t, 0) = q(t)$ . Then, the age-structure equation can now be found by differentiating with respect to time. This can be expressed as

$$\begin{aligned} \frac{\partial \rho}{\partial t} + \frac{\partial \rho}{\partial a} &= \frac{d\Phi(a)}{da}\Theta(t, t - a)q(t - a) \\ &+ \Phi(a)q(t - a)\left(\frac{\partial \Theta(t, t - a)}{\partial t} + \frac{\partial \Theta(t, t - a)}{\partial a}\right), \end{aligned} \quad (3)$$

where we use the relations in which  $\frac{dt}{dt} = \frac{da}{dt} = 1$  and  $\frac{\partial q(t-a)}{\partial t} = -\frac{\partial q(t-a)}{\partial a}$ . If we define a hazard rate  $\gamma$  dependent only on age  $a$  by  $\gamma(a) = \frac{\phi(t)}{\Phi(a)}$  as [?], then the rate of change of  $\Phi$  is as follows:

$$\frac{d\Phi(a)}{da} = -\gamma(a)\Phi(a), \quad (4)$$

by  $\frac{d\Phi(a)}{da} = -\phi(a)$ . The elementary equation (4) is solved as

$$\Phi(a) = e^{-\int_0^a \gamma(s) ds},$$

which equals (2). Note that the Markovian survival function is given by (1)

$$\Theta(t, t - a) = e^{-\int_{t-a}^t \lambda(s) ds}. \quad (5)$$

With all things considered above, (5) is

$$\begin{aligned} \frac{\partial \Theta(t, t - a)}{\partial t} + \frac{\partial \Theta(t, t - a)}{\partial a} &= -(\lambda(t) - \lambda(t - a))\Theta(t, t - a) - \lambda(t - a)\Theta(t, t - a) \\ &= -\lambda(t)\Theta(t, t - a) \end{aligned} \quad (6)$$

and substituting (4) and (6) into (3), we have

$$\frac{\partial \rho(t, a)}{\partial t} + \frac{\partial \rho(t, a)}{\partial a} = -\gamma(a)\rho(t, a) - \lambda(t)\rho(t, a), \quad (7)$$

where  $\rho(t, 0) = q(t)$ . Summing all ages,  $\rho(t) = \int_0^t \rho(t, a) da$ . Then,

$$\frac{d\rho}{dt} = \rho(t, t) + \int_0^t \frac{\partial \rho(t, a)}{\partial t} da. \quad (8)$$

Integrating (7) with respect to  $a$ ,

$$\int_0^t \frac{\partial \rho(t, a)}{\partial t} da + \rho(t, t) - \rho(t, 0) = -\lambda(t)\rho(t) - \int_0^t \gamma(a)\rho(t, a) da. \quad (9)$$

Substituting (9) into (8),

$$\begin{aligned}\frac{d\rho(t)}{dt} &= \rho(t, t) - \rho(t, t) + \rho(t, 0) - \lambda(t)\rho(t) - \int_0^t \gamma(a)\rho(t, a) da \\ &= q^+(t) - \lambda(t)\rho(t) - \int_0^t \gamma(a)\Phi(a)\Theta(t, t-a)q(t-a) da.\end{aligned}\tag{10}$$

Because  $\gamma(a) = \frac{\phi(a)}{\Phi(a)}$ , (10) becomes

$$\frac{d\rho(t)}{dt} = q^+(t) - \lambda(t)\rho(t) - \int_0^t \phi(a)\Theta(t, t-a)q(t-a) da.$$

This is an evolution equation of the compartment when considering both Markovian and non-Markovian processes. For a multi-compartment case, we may define the equation as follows.

$$\begin{aligned}\frac{d\rho_k(t)}{dt} &= q_k^+(t) - \lambda_k(t)\rho_k(t) \\ &\quad - \int_0^t \phi_k(a)\Theta_k(t, t-a)q_k(t-a) da, \quad k = 1, 2, \dots, m \in N.\end{aligned}$$
